# Supplementary material for: Quantification of Antisense Oligonucleotides by Splint Ligation and Quantitative Polymerase Chain Reaction
Source: PubMed Central journal article supplement (PMC8817697; doi:10.1089/nat.2021.0040), 2022-01-31
Supplement: Supp_FigS2.pdf [file Supp_FigS2.pdf]

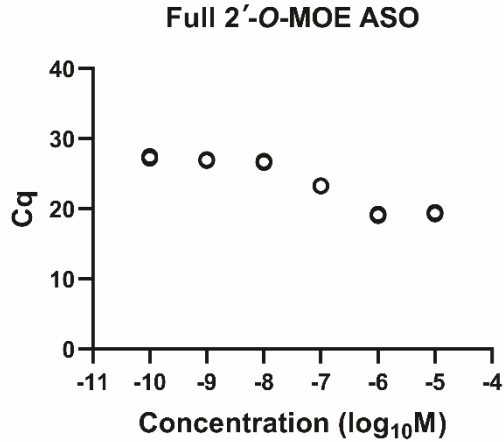

**Supplementary Figure S2.** Standard curve for fully modified 2'-O-MOE ASO diluted in water using 2.5 U/reaction of SplintR ligase. The qPCR for each standard point was performed in technical triplicate.
