# Supplementary material for: Quantification of Antisense Oligonucleotides by Splint Ligation and Quantitative Polymerase Chain Reaction
Source: PubMed Central journal article supplement (PMC8817697; doi:10.1089/nat.2021.0040), 2022-01-31
Supplement: Supp_FigS3.pdf [file Supp_FigS3.pdf]

**A**

**Full 2'-O-MOE**

5' GCCCCTA G C G C GCGACTC 3'

Probe pairs

|                                                  |       |                                      |    |   |
|--------------------------------------------------|-------|--------------------------------------|----|---|
| 3' AATTCGGGACGCACAGAGGCTGAGTCGCCGGGGATpC         | G C G | CGCTGAGGACAGCACTGACGGGTATCTCTCCAGCTC | 5' | 1 |
| 3' AATTCGGGACGCACAGAGGCTGAGTCGCCGGGGAT CpG       | C G   | CGCTGAGGACAGCACTGACGGGTATCTCTCCAGCTC | 5' | 2 |
| 3' AATTCGGGACGCACAGAGGCTGAGTCGCCGGGGAT C GpC     | G G   | CGCTGAGGACAGCACTGACGGGTATCTCTCCAGCTC | 5' | 3 |
| 3' AATTCGGGACGCACAGAGGCTGAGTCGCCGGGGAT C G CpG   | C G   | CGCTGAGGACAGCACTGACGGGTATCTCTCCAGCTC | 5' | 4 |
| 3' AATTCGGGACGCACAGAGGCTGAGTCGCCGGGGAT C G C GpC | G C G | CGCTGAGGACAGCACTGACGGGTATCTCTCCAGCTC | 5' | 5 |

Probe B

Probe A

**B**

Probe pair 1

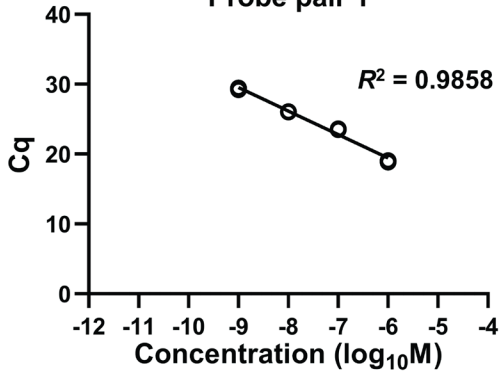

**C**

Probe pair 2

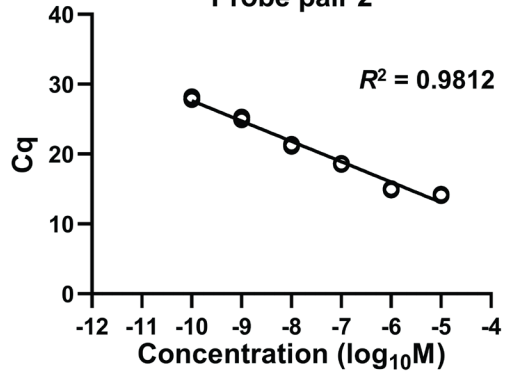

**D**

Probe pair 3

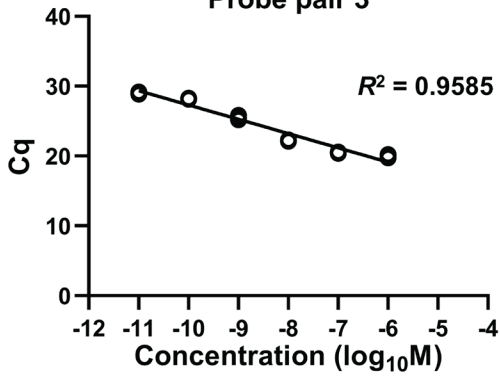

**E**

Probe pair 4

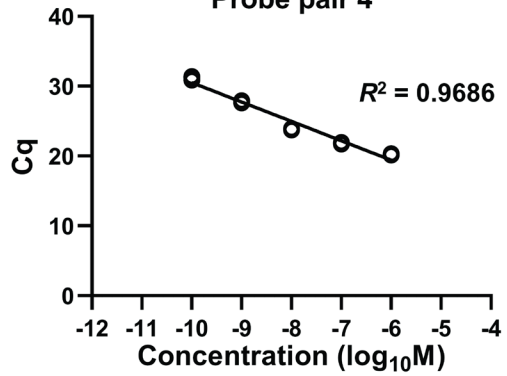

**F**

Probe pair 5

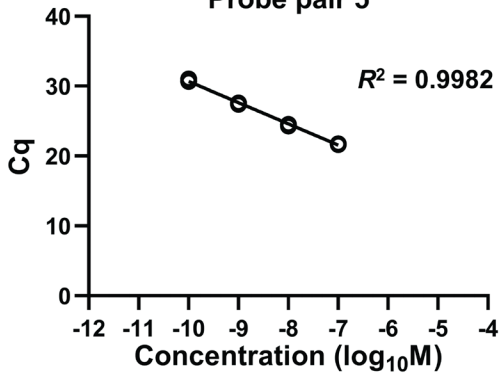

**Supplementary Figure S3.** Optimization of ligation probe sequences for fully modified 2'-*O*-MOE ASO. **(A)** Details of the pairs of ligation probe A (in blue) and probe B (in red) with different complementary sequences are presented along with the target ASO sequence (in black). **(B-F)** Standard curve for fully modified 2'-*O*-MOE ASO diluted in water using 25 U/reaction of SplintR ligase by different ligation probe pair. The qPCR for each standard point was performed in technical triplicate.
