# Supplementary material for: Quantification of Antisense Oligonucleotides by Splint Ligation and Quantitative Polymerase Chain Reaction
Source: PubMed Central journal article supplement (PMC8817697; doi:10.1089/nat.2021.0040), 2022-01-31
Supplement: Supp_FigS4.pdf [file Supp_FigS4.pdf]

**A**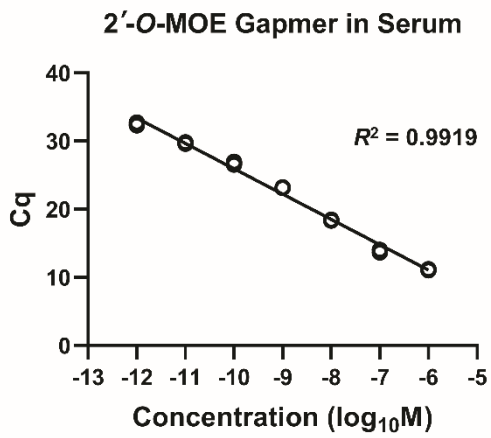**B**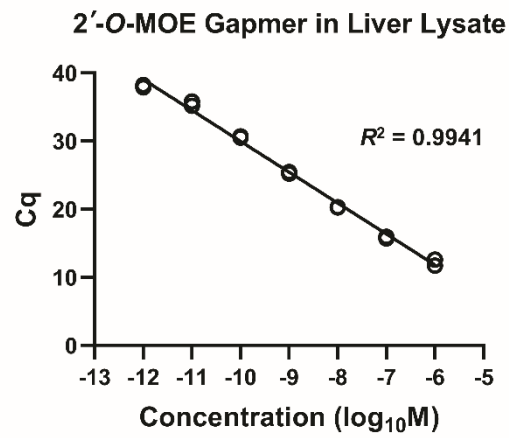

**Supplementary Figure S4.** Evaluation of the efficacy of the SplintR qPCR assay to quantify ASOs in biological matrices. The standard curve was generated using diluted 2'-O-MOE gapmer in a matrix containing mouse **(A)** serum or **(B)** liver lysate. The qPCR for each standard point was performed in technical triplicate.
