# Supplementary material for: Quantification of Antisense Oligonucleotides by Splint Ligation and Quantitative Polymerase Chain Reaction
Source: PubMed Central journal article supplement (PMC8817697; doi:10.1089/nat.2021.0040), 2022-01-31
Supplement: Supp_FigS5.pdf [file Supp_FigS5.pdf]

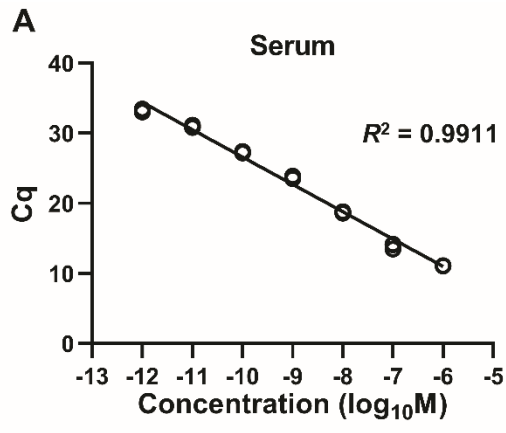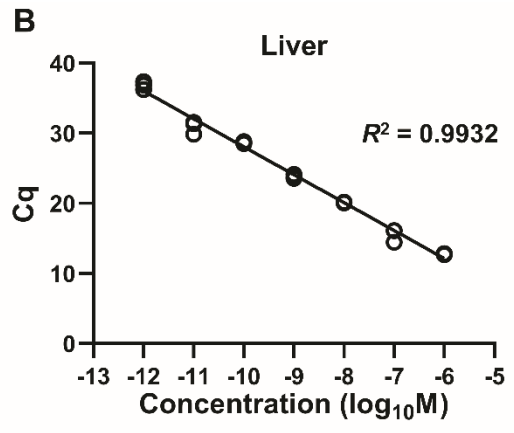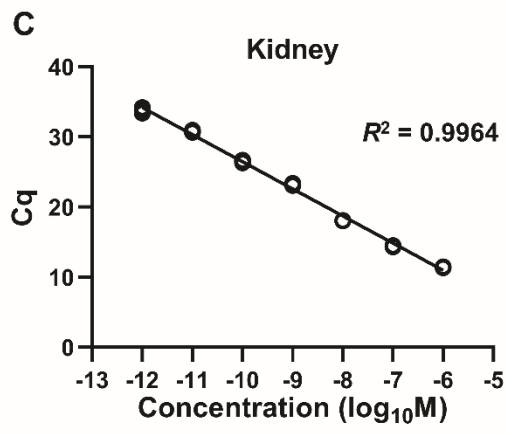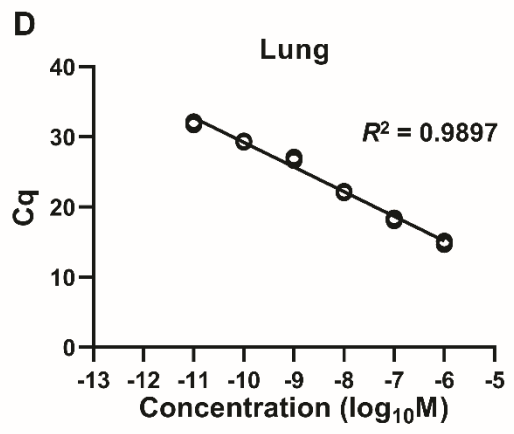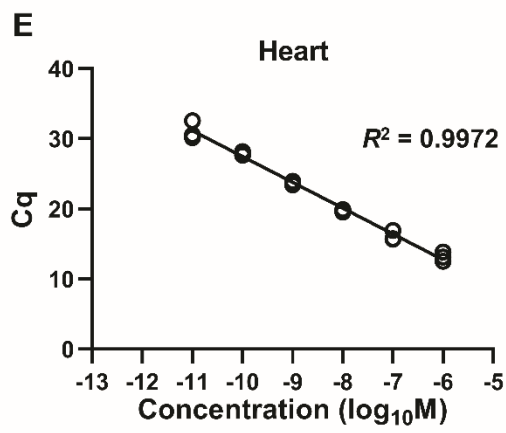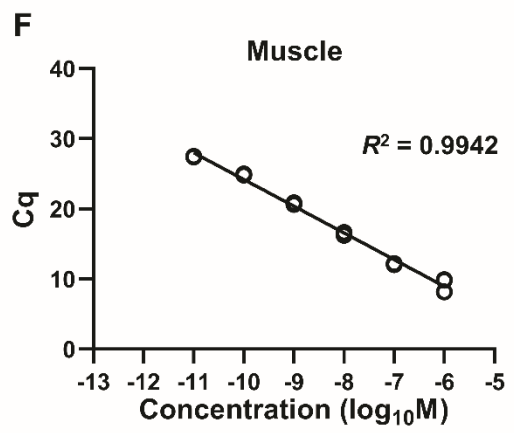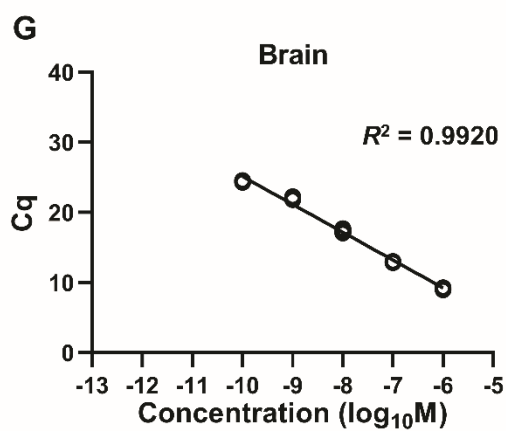

**Supplementary Figure S5.** Standard curve for 2'-*O*-MOE gapmer from: (A) serum, and (B-G) different tissue lysates. The linear regression obtained from each biological matrix was used for quantification of 2'-*O*-MOE gapmer in Figure 3. The qPCR for each standard point was performed in technical triplicate.
