# Supplementary material for: Quantification of Antisense Oligonucleotides by Splint Ligation and Quantitative Polymerase Chain Reaction
Source: Nucleic Acid Ther. 2022 Jan 31;32(1):66–73. doi: 10.1089/nat.2021.0040 (PMC8817697; doi:10.1089/nat.2021.0040)

**2'-O-MOE Gapmer**

|                                                                                            |                               |                                 |
|--------------------------------------------------------------------------------------------|-------------------------------|---------------------------------|
| <b>Probe B</b>                                                                             | 5' GCCCCTAG CGCGCGACTC 3'     | <b>Probe A</b>                  |
| 3' AATTCGGGACGCACAGAGGCTGAGTCGCCGGGGATc <b>pGCGCGCTGAGGACAGCACTGACGGGTATCTCTCCAGCTC</b> 5' |                               | <b>Probe pair 2</b>             |
|                                                                                            | 5' CTAG CGCGCGACTCC_GTCGTG 3' | <b>Double-quenched probe v1</b> |
|                                                                                            | 5' CTAG CGCGCGACTCCTGTCGTG 3' | <b>Double-quenched probe v2</b> |

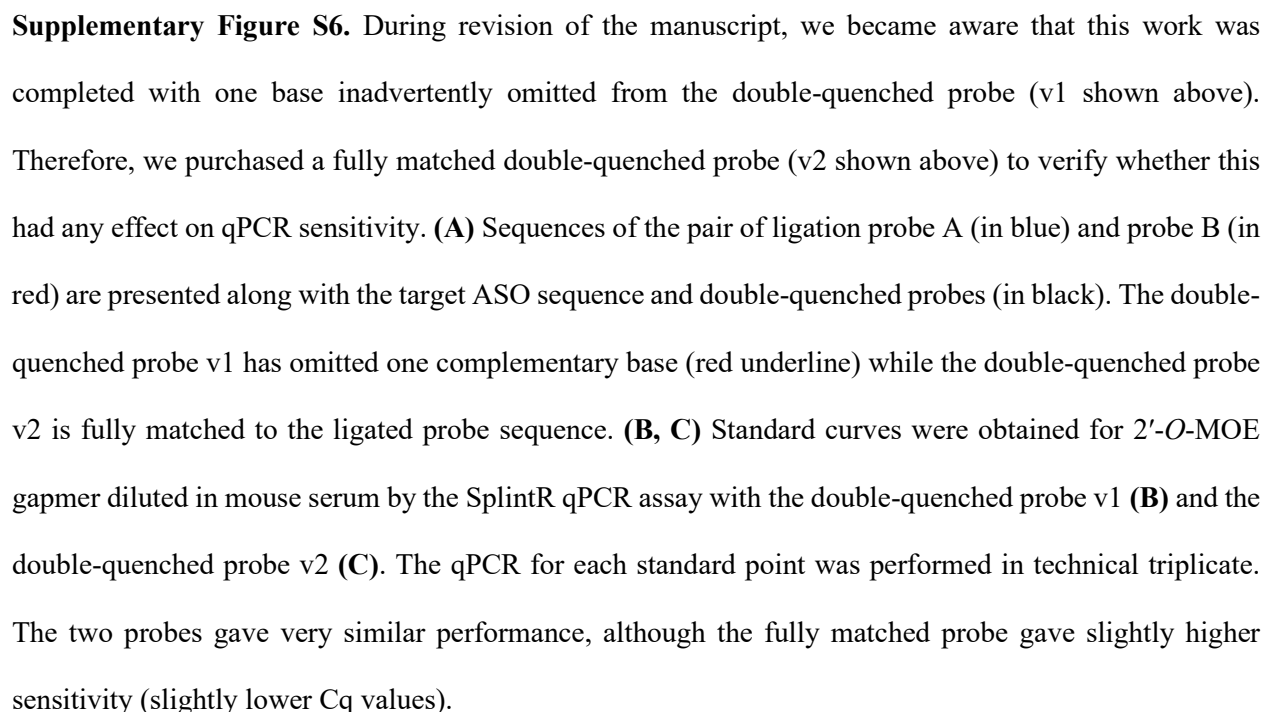

Supplement: Supplemental data [file Supp_FigS6.pdf]
